# Supplementary material for: Concentration determination of new fungicide in river water by ultrasound-assisted emulsification micro-extraction and reversed-phase high performance liquid chromatography
Source: Royal Society of Chemistry journal article supplement (doi:10.1039/c2ay25372k), 2012-01-01
Supplement: c2ay25372k.pdf [file c2ay25372k.pdf]

Expression of Concern for *Analytical Methods*

---

**Concentration determination of new fungicide in river water by ultrasound-assisted emulsification micro-extraction and reversed-phase high performance liquid chromatography**

Zhixi Gao, Yanhong Wu, Huajun Zhao, Fangying Ji, Qiang He and Si Li

*Anal. Methods*, 2012, **4**, 2365–2368 (DOI: 10.1039/C2AY25372K)

---

The following article ‘Concentration determination of new fungicide in river water by ultrasound-assisted emulsification micro-extraction and reversed-phase high performance liquid chromatography’ by Zhixi Gao, Yanhong Wu, Huajun Zhao, Fangying Ji, Qiang He and Si Li, has been published in *Analytical Methods*, 2012, **4**, 2365–2368. The article reports the determination of the fungicides pyrimethanil and imazalil in river water by ultrasound-assisted emulsification micro-extraction (USAEME) and reversed-phase high performance liquid chromatography (RP-HPLC).

*Analytical Methods* is publishing this Expression of Concern in order to alert our readers to the fact that we have received significant concerns from members of the community regarding the similarity of the data presented in this article as Figure 5A, and that also published in the article Chinese Agricultural Science Bulletin, 2012, **28**(06), 217–221 as Figure 2.

In response to our inquiries, the authors have provided additional information which is currently under investigation with the institution of the corresponding author. This Expression of Concern will continue to be associated with the article until the investigation into this matter has been concluded.

May Copsey  
15<sup>th</sup> November  
Managing Editor, *Analytical Methods*

---
