# Supplementary material for: Concentration determination of new fungicide in river water by ultrasound-assisted emulsification micro-extraction and reversed-phase high performance liquid chromatography
Source: Royal Society of Chemistry journal article supplement (doi:10.1039/c2ay25372k), 2012-01-01
Supplement: c2ay25372k_2.pdf [file c2ay25372k_2.pdf]

Expression of Concern for *Analytical Methods*

---

**Concentration determination of new fungicide in river water by ultrasound-assisted emulsification micro-extraction and reversed-phase high performance liquid chromatography**

Zhixi Gao, Yanhong Wu, Huajun Zhao, Fangying Ji, Qiang He and Si Li

*Anal. Methods*, 2012, **4**, 2365–2368 (DOI: 10.1039/C2AY25372K)

---

This is an update to the Expression of Concern published on 15<sup>th</sup> November in *Analytical Methods* concerning the above article, and to alert readers to the fact that the authors have now published a Correction to the article in the *Chinese Agricultural Science Bulletin*, 2012, **28**(06), 217–221, replacing Figure 2. The situation is currently under investigation with the institution of the corresponding author, and this Expression of Concern will continue to be associated with the article until the matter has been fully resolved.

May Copsey  
10<sup>th</sup> April  
Managing Editor, *Analytical Methods*

---
